# Supplementary material for: Peroxisomal NAD(H) Homeostasis in the Yeast Debaryomyces hansenii Depends on Two Redox Shuttles and the NAD+ Carrier, Pmp47
Source: MDPI journal article supplement (doi:10.3390/biom13091294), 2023-08-24
Supplement: s1 [file s1]

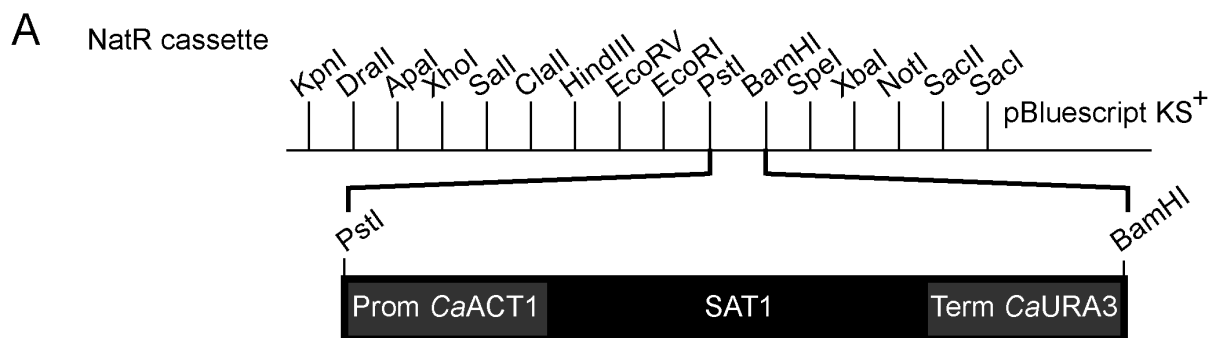

**B** ORF deletion

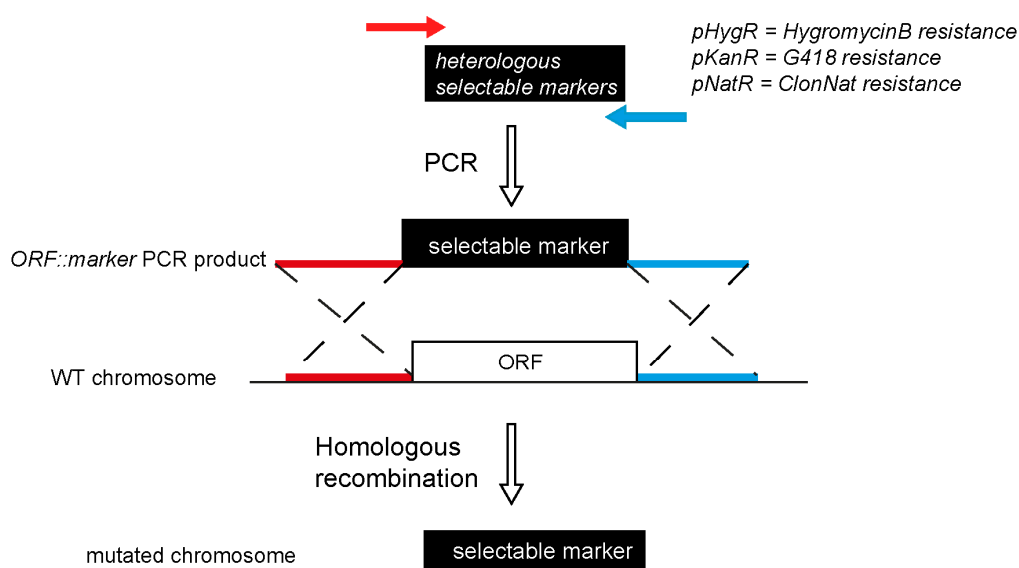

**C** N-terminal GFP-tagging      C-terminal GFP-tagging

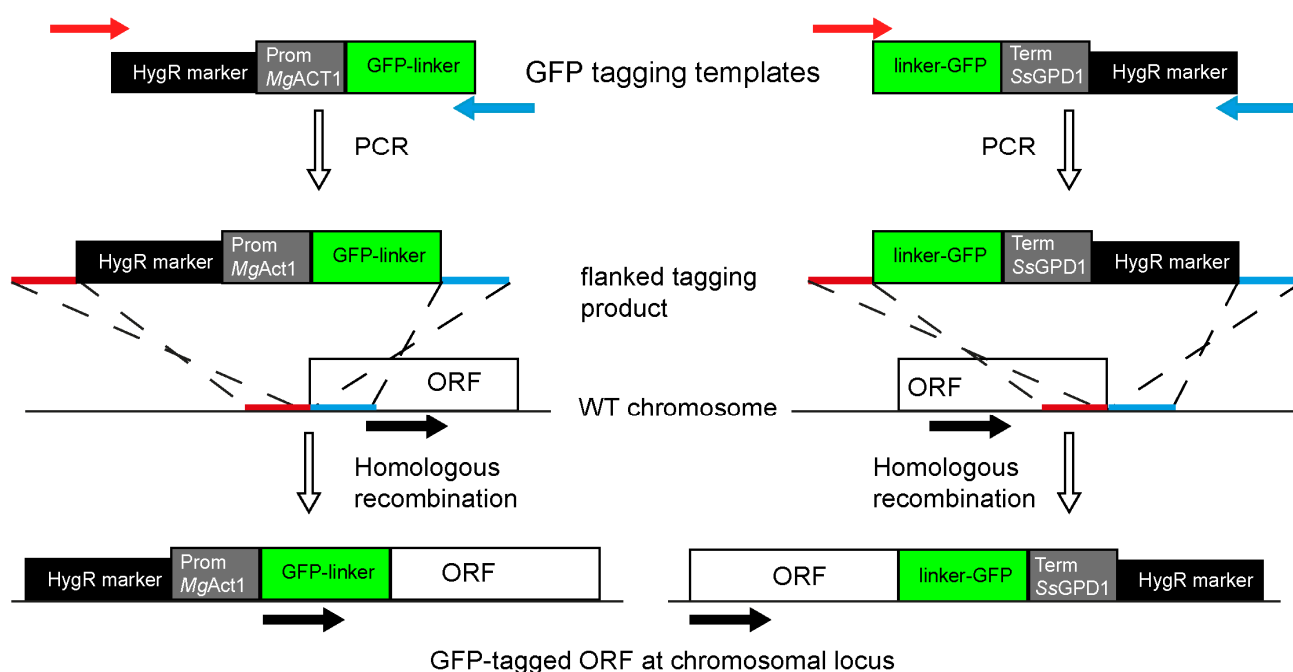

**Figure S1.** New tools for genome modification of the CTG clade yeast *Debaryomyces hansenii* isolates. **(A)** Diagram depicting the structure of the ClonNat resistance marker adapted from pFA-SAT1 flipper cassette previously used in *Candida albicans* [24,17]. Unique restriction sites in the multiple cloning site of Bluescript KS+ are indicated. Prom *CaAct1*: *C. albicans ACT1* promoter region. *CaURA3 term*: *C. albicans URA3* terminator region. SAT1, streptothricin acetyltransferase, which confers resistance to nourseothricin or clonNat. For sequences see Table S5. **(B)** Strategy for deletion of open reading frames using heterologous selectable markers. Three markers were used pHygR, pKanR and pSat1, that confer resistance to HygromycinB, G418 and ClonNat, respectively. These plasmids are flanked by sequences identical to the region directly upstream (red) or downstream (blue) of the target ORF. During initial experiments, large flanking regions of 500 bp to 1kb were cloned into the selection marker plasmids. These large cassettes were subsequently amplified by PCR. However, recently we also developed a PCR-based method in which the selectable marker cassette plasmids can be used as PCR templates using primers that anneal on the cassettes and contain 50 nt 5' extensions identical to the region directly upstream (red) or downstream (blue) of the target ORF [5]. For primer design see Table S4. Transformation of the PCR products by electroporation results in deletion of the ORF through homologous recombination with high efficiency. **(C)** Two tagging cassettes containing the HygR marker were generated that allow tagging of an ORF in its chromosomal locus resulting in constitutive expression of N-terminally tagged proteins or C-terminal GFP-tagged proteins under control of their own promoter. Prom *MgAct1*: *Meyerozyma guilliermondii ACT1* gene promoter region. Term *SsGPD1*: *Scheffersomyces stipitis GPD1* terminator region. See Table S5 for sequences. These plasmids can be used as PCR templates using primers that have 50 nt extensions identical to the region directly upstream of the target insertion site (red) and directly downstream of the insertion site (blue). For primer design see Table S4. Homologous recombination inserts the cassettes into the target site in the genome. Note, for N-terminal tagging, the original translational start codon is replaced by the GFP start codon. For C-terminal tagging, the stop codon of the target ORF is deleted and gly-ala-gly-ala-gly linker followed by GFP is inserted in frame with the ORF.

A

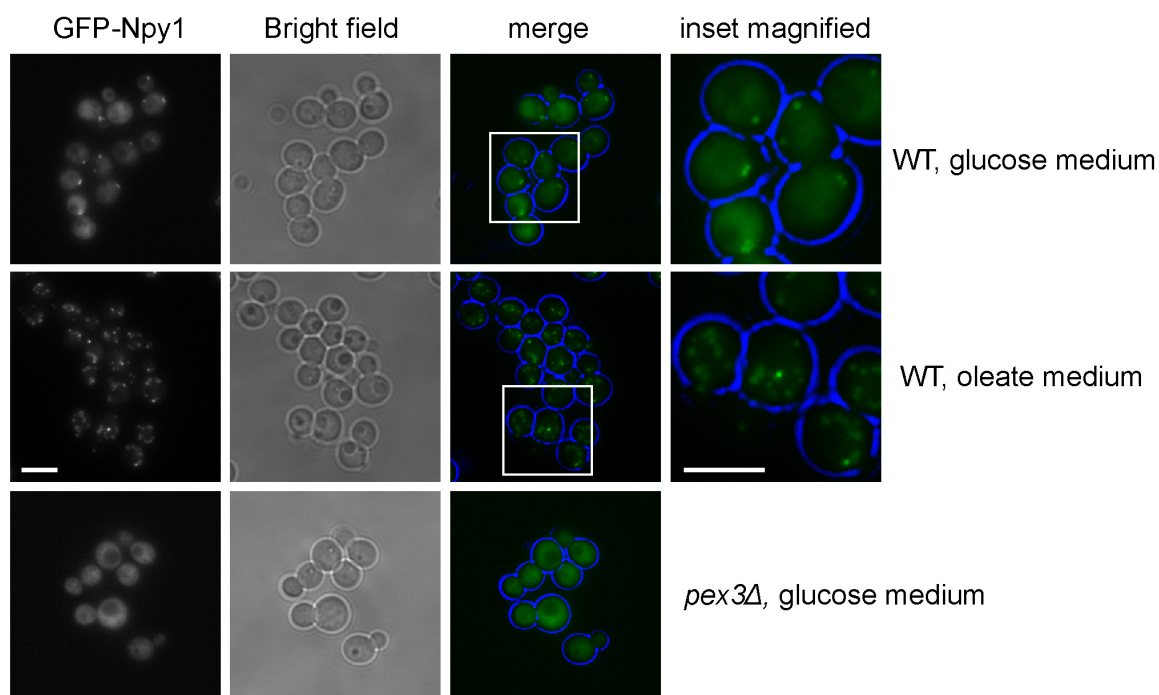

B

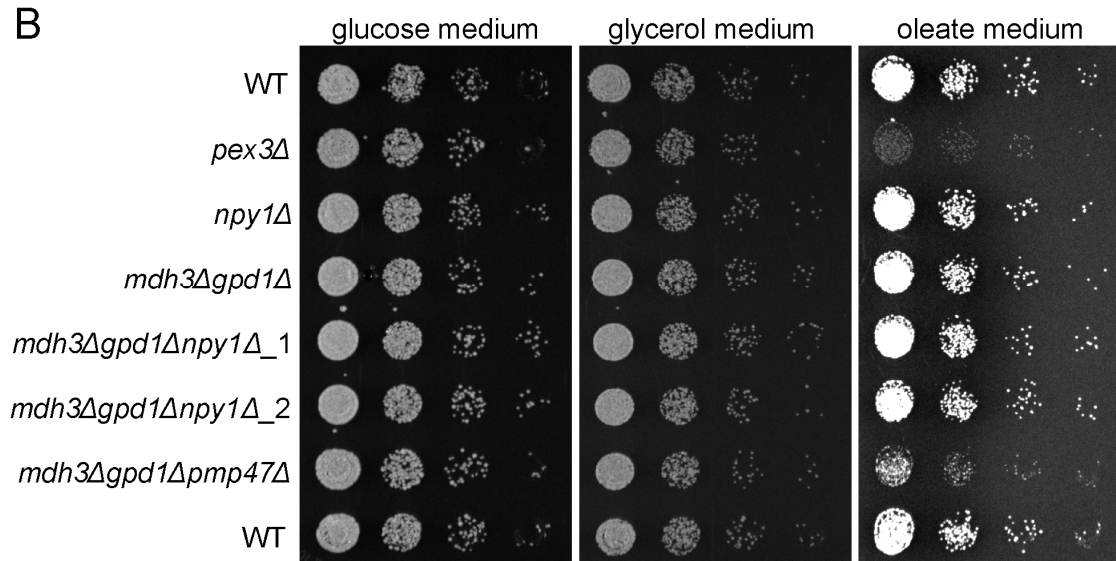

**Figure S2.** *DhNpy1* is a peroxisomal protein not required for growth on oleate. **(A)** Representative epifluorescence microscopy images of wild-type and *pex3Δ* *D. hansenii* cells expressing mCherry-PTS1 and Npy1 tagged with GFP expressed from its chromosomal locus (GFP-Npy1). Wild-type cells were grown on glucose or oleate media. *pex3Δ* cells were only imaged after growth on glucose medium. Green channel images are merged Z-stacks. Bright field (BF) images were collected in one plane and were processed to highlight the cell circumference in blue in other panels. Scale bar: 5  $\mu$ m. **(B)** Growth analysis of wild-type and mutant *D. hansenii* cells on media containing glucose, glycerol or oleate as sole carbon source. Two independent *gpd1Δmdh3Δnpy1Δ* strains were analysed.

**Table S1.** Orthologues of  $\beta$ -oxidation-related proteins identified in *D. hansenii*.

| Protein                                                        | Genes identified in <i>D. hansenii</i>         | PTS1/PTS2 prediction                                                                                   | Ortholog in <i>H. sapiens</i> | Ortholog in <i>S. cerevisiae</i> | Ortholog in <i>U. maydis</i> |
|----------------------------------------------------------------|------------------------------------------------|--------------------------------------------------------------------------------------------------------|-------------------------------|----------------------------------|------------------------------|
| Acyl-CoA oxidase (Pox1/Fox1)                                   | Q6BVP3, Q6BRD5, Q6BRD8                         | No                                                                                                     | Yes                           | Yes                              | Yes                          |
| Acyl-CoA Dehydrogenase N (Acad11n)                             | Q6BX30                                         | PTS1 (-SKL)                                                                                            | Yes                           | No                               | Yes                          |
| Acyl-CoA Dehydrogenase C (Acad11c)                             | Q6BQL2                                         | PTS1 (-SKL)                                                                                            | Yes                           | No                               | Yes                          |
| 3-hydroxyacyl-CoA dehydrogenase and enoyl-CoA hydratase (Fox2) | Q6BYL5                                         | PTS1 (-AKI)                                                                                            | Yes                           | Yes                              | Yes                          |
| 3-Ketoacyl-CoA thiolase (Pot1/Fox3)                            | Q6BVV6, Q6BNX5, Q6BR82, Q6BM30                 | Q6BVV6: PTS2 (-RLNQVLGHL),<br>Q6BXN5: PTS2 (-RLNQLSGQL),<br>Q6BM30: PTS1 (-SKL),<br>Q6BR82: none       | Yes                           | Yes                              | Yes                          |
| Sterol Carrier Protein 2 (Pox18)-like protein                  | Q6BYJ2                                         | PTS1 (-AKL)                                                                                            | Yes                           | No                               | Yes                          |
| Malate Dehydrogenase 3 (Mdh3)                                  | Q6BM17                                         | PTS1 (-SKL)                                                                                            | No                            | Yes                              | Yes                          |
| Glycerol-3-phosphate Dehydrogenase (Gpd1)                      | Q6BM03?                                        | Non-consensus PTS2 (-RANQRLQQL)                                                                        | Yes                           | Yes                              | Yes                          |
| Carnitine-O-Acetyltransferase                                  | B5RTK8                                         | PTS1 (-AKL)                                                                                            | Yes                           | Yes                              | Yes                          |
| 2,4-Dienoyl-CoA reductase (Sps19)                              | Q6BVJ4, Q6BH12                                 | PTS1 (Q6BVJ4:-NKL, Q6BH12: -SKL)                                                                       | Yes                           | Yes                              | Yes                          |
| Delta3,5-Delta2,4-dienoyl-CoA isomerase (Dci1)                 | Q6BML0                                         | No                                                                                                     | Yes                           | Yes                              | Yes                          |
| Related to $\Delta^3,\Delta^2$ -enoyl-CoA isomerase (Eci1)     | Q6BQU9, Q6BZL5                                 | No                                                                                                     | Yes                           | Yes                              | Yes                          |
| Peroxisomal Acyl CoA Thioesterase                              | Q6BPV5, Q6BZL6, Q6BPV3, Q6BPV4                 | Q6BPV5: PTS1 (-AKL),<br>Q6BZL6: PTS1 (-PKL),<br>Q6BPV3: PTS1 (-AKL),<br>Q6BPV4: none                   | Yes                           | Yes                              | No                           |
| Related to Acyl-CoA Ligase                                     | Q6BWM7, Q6BSB7, Q6BSB6, B5RV06, Q6BWF8, Q6BJ16 | Q6BWM7: PTS1 (-SKF),<br>Q6BSB7 & B5RV06: PTS1 (-AKF),<br>Q6BWF8: PTS1 (-SKL).<br>Q6BSB6 & Q6BJ16: none | Yes                           | Yes                              | Yes                          |

|                                                 |        |             |     |     |     |
|-------------------------------------------------|--------|-------------|-----|-----|-----|
| Very Long Chain acyl-CoA Synthase (Fat1)        | Q6BL99 | PTS1 (-AKL) | Yes | Yes | Yes |
| Peroxisomal Half ABC Transporter (Pxa1)         | Q6BUD3 | No          | Yes | Yes | Yes |
| Peroxisomal Half ABC Transporter (Pxa2)         | Q6BWT7 | No          | Yes | Yes | Yes |
| Adenine Nucleotide Transporter 1 (Ant1)         | Q6BQ51 | No          | Yes | Yes | Yes |
| Peroxin 11 (Pex11)                              | Q6BYZ1 | No          | Yes | Yes | Yes |
| Nudix Hydrolase (Npy1)                          | Q6BV93 | PTS1 (-NKL) | Yes | Yes | Yes |
| Peroxisome Membrane Protein (Pmp47/Ant1/PMP 34) | Q6BI42 | No          | Yes | Yes | No  |

**Table S2.** The list of *D. hansenii* and *S. cerevisiae* strains used in this study.

| Strain Name       | Genotype                                                    | Type of Organism   | Source     |
|-------------------|-------------------------------------------------------------|--------------------|------------|
| NCYC 102          | Wild-type                                                   | <i>D. hansenii</i> | NCYC       |
| NCYC 3363         | Wild-type                                                   | <i>D. hansenii</i> | NCYC       |
| <i>pex3Δ</i>      | NCYC102, <i>pex3::SAT1</i>                                  | <i>D. hansenii</i> | This study |
| <i>pex3Δ</i>      | NCYC3363, <i>pex3::SAT1</i>                                 | <i>D. hansenii</i> | This study |
| <i>mdh3Δ</i>      | NCYC3363, <i>mdh3::hygB<sup>r</sup></i>                     | <i>D. hansenii</i> | This study |
| <i>gpd1Δ</i>      | NCYC3363, <i>gpd1::SAT1</i>                                 | <i>D. hansenii</i> | This study |
| <i>gpd1Δmdh3Δ</i> | NCYC3363, <i>gpd1::SAT1</i> , <i>mdh3::hygB<sup>r</sup></i> | <i>D. hansenii</i> | This study |
| <i>pmp47Δ</i>     | NCYC3363, <i>pmp47::hygB<sup>r</sup></i>                    | <i>D. hansenii</i> | This study |
| <i>npy1Δ</i>      | NCYC3363, <i>npy1::G418<sup>r</sup></i>                     | <i>D. hansenii</i> | This study |

|                                      |                                                                                                                                      |                    |            |
|--------------------------------------|--------------------------------------------------------------------------------------------------------------------------------------|--------------------|------------|
| <i>gpd1Δpmp47Δ</i>                   | NCYC3363, <i>gpd1::SAT1</i> , <i>pmp47::G418<sup>r</sup></i>                                                                         | <i>D. hansenii</i> | This study |
| <i>mdh3Δpmp47Δ</i>                   | NCYC3363, <i>mdh3::hygB<sup>r</sup></i> , <i>pmp47::G418<sup>r</sup></i>                                                             | <i>D. hansenii</i> | This study |
| <i>gpd1Δmdh3Δpmp47Δ</i>              | NCYC3363, <i>gpd1::SAT1</i> , <i>mdh3::hygB<sup>r</sup></i> , <i>pmp47::G418<sup>r</sup></i>                                         | <i>D. hansenii</i> | This study |
| <i>gpd1Δmdh3Δnpy1Δ</i>               | NCYC3363, <i>mdh3::hygB<sup>r</sup></i> , <i>gpd1::SAT1</i> , <i>npy1::G418<sup>r</sup></i>                                          | <i>D. hansenii</i> | This study |
| <i>fox2Δ</i>                         | NCYC3363, <i>fox2::hygB<sup>r</sup></i>                                                                                              | <i>D. hansenii</i> | This study |
| NCYC102 + mCherry-SKL                | NCYC102, <i>ARG1/arg1::SsGpd1pr-yemCherry-SKL (G418<sup>r</sup>)</i>                                                                 | <i>D. hansenii</i> | This study |
| <i>pex3Δ</i> + mCherry-SKL           | NCYC102, <i>pex3::SAT1</i> , <i>ARG1/arg1::SsGpd1pr-yemCherry-SKL (G418<sup>r</sup>)</i>                                             | <i>D. hansenii</i> | This study |
| NCYC102 + mCherry-SKL, GFP-MDH3      | NCYC102, <i>HygB<sup>r</sup> MgAct1pr-GFP-MDH3</i> , <i>ARG1/arg1::SsGpd1pr-yemCherry-SKL (G418<sup>r</sup>)</i>                     | <i>D. hansenii</i> | This study |
| <i>pex3Δ</i> + mCherry-SKL, GFP-MDH3 | NCYC102, <i>pex3::SAT1</i> , <i>HygB<sup>r</sup> MgAct1pr-GFP-MDH3</i> , <i>ARG1/arg1::SsGpd1pr-yemCherry-SKL (G418<sup>r</sup>)</i> | <i>D. hansenii</i> | This study |
| NCYC102 + mCherry-SKL, GPD1-GFP      | NCYC102, <i>GPD1-GFP::HygB<sup>r</sup></i> , <i>ARG1/arg1::SsGpd1pr-yemCherry-SKL (G418<sup>r</sup>)</i>                             | <i>D. hansenii</i> | This study |
| <i>pex3Δ</i> + mCherry-SKL, GPD1-GFP | NCYC102, <i>pex3::SAT1</i> , <i>GPD1-GFP::HygB<sup>r</sup></i> , <i>ARG1/arg1::SsGpd1pr-yemCherry-SKL (G418<sup>r</sup>)</i>         | <i>D. hansenii</i> | This study |
| NCYC102 + mCherry-SKL, PMP47-GFP     | NCYC102, <i>PMP47-GFP::HygB<sup>r</sup></i> , <i>ARG1/arg1::SsGPD1pr-yemCherry-SKL (G418<sup>r</sup>)</i>                            | <i>D. hansenii</i> | This study |
| NCYC102, GFP-NPY1                    | NCYC102, <i>HygB<sup>r</sup> -MgAct1pr-GFP-NPY1 (HygB<sup>r</sup>)</i>                                                               | <i>D. hansenii</i> | This study |
| <i>pex3Δ</i> , GFP-NPY1              | NCYC102, <i>pex3::SAT1</i> , <i>HygB<sup>r</sup> -MgAct1pr-GFP-NPY1</i>                                                              | <i>D. hansenii</i> | This study |

|                                                                        |                                                                                                                  |                      |            |
|------------------------------------------------------------------------|------------------------------------------------------------------------------------------------------------------|----------------------|------------|
| BJ1991                                                                 | <i>MAT<math>\alpha</math>, leu2, trp1, ura3-251, prb1-1122, pep4-3, gal2</i>                                     | <i>S. cerevisiae</i> | [41]       |
| <i>fox1<math>\Delta</math></i>                                         | BJ1991, <i>fox1::KanMX</i>                                                                                       | <i>S. cerevisiae</i> | Euroscarf  |
| <i>mdh3<math>\Delta</math></i>                                         | BJ1991, <i>mdh3::LEU2</i>                                                                                        | <i>S. cerevisiae</i> | [11]       |
| <i>gpd1<math>\Delta</math></i>                                         | BJ1991, <i>gpd1::BLE</i>                                                                                         | <i>S. cerevisiae</i> | [7]        |
| <i>mdh3<math>\Delta</math>gpd1<math>\Delta</math></i>                  | BJ1991, <i>mdh3::LEU2, gpd1::KanMX</i>                                                                           | <i>S. cerevisiae</i> | [7]        |
| <i>mdh3<math>\Delta</math>npv1<math>\Delta</math></i>                  | BJ1991, <i>mdh3::LEU2, npv1::BLE</i>                                                                             | <i>S. cerevisiae</i> | [11]       |
| BJ1991 + <i>DhPMP47</i>                                                | BJ1991, + <i>CTA1pr-DhPMP47</i> (ARS1/CEN4, URA3)                                                                | <i>S. cerevisiae</i> | This study |
| <i>mdh3<math>\Delta</math></i> + <i>DhPMP47</i>                        | BJ1991, <i>mdh3::LEU2, CTA1pr-DhPMP47</i> (ARS1/CEN4, URA3)                                                      | <i>S. cerevisiae</i> | This study |
| <i>gpd1<math>\Delta</math></i> + <i>DhPMP47</i>                        | BJ1991, <i>gpd1::BLE, CTA1pr-DhPMP47</i> (ARS1/CEN4, URA3)                                                       | <i>S. cerevisiae</i> | This study |
| <i>mdh3<math>\Delta</math>gpd1<math>\Delta</math></i> + <i>DhPMP47</i> | BJ1991, <i>mdh3::LEU2, gpd1::KanMX, CTA1pr-DhPMP47</i> (ARS1/CEN4, URA3)                                         | <i>S. cerevisiae</i> | This study |
| <i>mdh3<math>\Delta</math>npv1<math>\Delta</math></i> + <i>DhPMP47</i> | BJ1991, <i>mdh3::LEU2; npv1::BLE, CTA1pr-DhPMP47</i> (ARS1/CEN4, URA3)                                           | <i>S. cerevisiae</i> | This study |
| BY4741                                                                 | <i>MATa his3<math>\Delta</math>1 leu2<math>\Delta</math>0 met15<math>\Delta</math>0 ura3<math>\Delta</math>0</i> | <i>S. cerevisiae</i> | Euroscarf  |
| <i>mdh3<math>\Delta</math></i>                                         | BY4741, <i>mdh3::SpHIS5</i>                                                                                      | <i>S. cerevisiae</i> | [7]        |
| <i>gpd1<math>\Delta</math>mdh3<math>\Delta</math></i>                  | BY4741, <i>gpd1::KanMX, mdh3::SpHIS5</i>                                                                         | <i>S. cerevisiae</i> | [7]        |
| BY4741 + <i>DhPMP47</i>                                                | BY4741, <i>CTA1pr-DhPMP47</i> (ARS1/CEN4, URA3)                                                                  | <i>S. cerevisiae</i> | This study |

|                                                        |                                                                                                     |                      |            |
|--------------------------------------------------------|-----------------------------------------------------------------------------------------------------|----------------------|------------|
| <i>mdh3Δ + DhPMP47</i>                                 | BY4741, <i>mdh3::SpHIS5</i> , <i>CTA1pr-DhPMP47</i> (ARS1/CEN4, URA3)                               | <i>S. cerevisiae</i> | This study |
| <i>gpd1Δmdh3Δ + DhPMP47</i>                            | BY4741, <i>gpd1::KanMX</i> , <i>mdh3::SpHIS5</i> , <i>CTA1pr-DhPMP47</i> (ARS1/CEN4, URA3)          | <i>S. cerevisiae</i> | This study |
| BY4741 + <i>DhMDH3</i>                                 | BY4741, <i>Tpi1pr-DhMDH3</i> (ARS1/CEN4, LEU2)                                                      | <i>S. cerevisiae</i> | This study |
| <i>gpd1/mdh3Δ + DhMDH3</i>                             | BY4741, <i>gpd1::KanMX</i> , <i>mdh3::SpHIS5</i> , <i>Tpi1pr-DhMDH3</i> (ARS1/CEN4, LEU2)           | <i>S. cerevisiae</i> | This study |
| BY4741 + <i>DhGPD1-GFP</i>                             | BY4741, <i>Tpi1pr-DhGPD1-GFP</i> (ARS1/CEN4, URA3)                                                  | <i>S. cerevisiae</i> | This study |
| <i>gpd1/mdh3Δ + DhGPD1-GFP</i>                         | BY4741, <i>gpd1::KanMX</i> , <i>mdh3::SpHIS5</i> , <i>Tpi1pr-DhGPD1-GFP</i> (ARS1/CEN4, URA3)       | <i>S. cerevisiae</i> | This study |
| BY4741 + <i>DhPMP47</i>                                | BY4741, <i>Tpi1pr-DhPMP47</i> (ARS1/CEN4, LEU2)                                                     | <i>S. cerevisiae</i> | This study |
| <i>gpd1Δmdh3Δ + DhPMP47</i>                            | BY4741, <i>gpd1::KanMX</i> , <i>Tpi1pr-DhPMP47</i> (ARS1/CEN4, LEU2)                                | <i>S. cerevisiae</i> | This study |
| BY4741 + <i>DhPMP47-GFP</i> + <i>Pex11-mRFP</i>        | BY4741, <i>Tpi1pr-DhPMP47-GFP</i> (ARS1/CEN4, LEU2) + <i>Pex11pr-ScPEX11-mRFP</i> (ARS1/CEN4, URA3) | <i>S. cerevisiae</i> | This study |
| BY4742                                                 | MATα <i>his3Δ1 leu2Δ0 lys2Δ0 ura3Δ0</i>                                                             | <i>S. cerevisiae</i> | Euroscarf  |
| BY4742 + <i>HsCPT2<sup>cyt</sup></i>                   | BY4742, <i>HsCPT2<sup>cyt</sup></i> (ARS1/CEN4, URA3)                                               | <i>S. cerevisiae</i> | This study |
| BY4742 + <i>HsCPT2<sup>PTS1</sup></i>                  | BY4742, <i>HsCPT2<sup>PTS1</sup></i> (ARS1/CEN4, URA3)                                              | <i>S. cerevisiae</i> | This study |
| BY4742 + <i>HsCPT2<sup>PTS1</sup></i> + <i>DhPMP47</i> | BY4742, <i>HsCPT2<sup>PTS1</sup></i> (ARS1/CEN4, URA3), <i>DhPMP47</i> (ARS1/CEN4, LEU2)            | <i>S. cerevisiae</i> | This study |
| <i>mdh3Δ + HsCPT2<sup>cyt</sup></i>                    | BY4742, <i>mdh3::KanMX</i> , <i>HsCPT2<sup>cyt</sup></i> (ARS1/CEN4, URA3)                          | <i>S. cerevisiae</i> | This study |



|                                                |                                                                                        |                      |            |
|------------------------------------------------|----------------------------------------------------------------------------------------|----------------------|------------|
| <i>mdh3Δ + HsCPT2<sup>PTS1</sup></i>           | BY4742, <i>mdh3::KanMX</i> , <i>HsCPT2<sup>PTS1</sup></i><br>(ARS1/CEN4, URA3)         | <i>S. cerevisiae</i> | This study |
| <i>mdh3Δ + HsCPT2<sup>PTS1</sup> + DhPMP47</i> | BY4742, <i>mdh3::KanMX</i> ,<br><i>HsCPT2<sup>PTS1</sup>::URA3</i> , (ARS1/CEN4, LEU2) | <i>S. cerevisiae</i> | This study |

**Table S3.** The list of plasmids used in this study.

| Plasmid Name | Insert                                                                                                             | Parental vector   | Purpose                                                                                            | Source     |
|--------------|--------------------------------------------------------------------------------------------------------------------|-------------------|----------------------------------------------------------------------------------------------------|------------|
| pHygR        | loxP- <i>S. stipitis</i> <i>TEF1</i> promoter-CTG adapted HygR ORF- <i>S. stipitis</i> <i>TEF1</i> terminator-loxP | pUC19             | To generate gene deletions/modifications in <i>D. hansenii</i> using HygR as a selection marker    | GenScript  |
| pKanR        | loxP- <i>S. stipitis</i> <i>ACT1</i> promoter-CTG adapted KanR ORF- <i>S. stipitis</i> <i>ACT1</i> terminator-loxP | pUC19             | To generate gene deletions/modifications in <i>D. hansenii</i> using KanR as a selection marker    | GenScript  |
| pNatR        | <i>CaACT1</i> promoter-CTG codon adapted SAT1 ORF- <i>CaURA3</i> terminator from plasmid pFA-SAT1                  | pBlueScript KS(+) | To generate gene deletions/modifications in <i>D. hansenii</i> using ClonNat as a selection marker | This study |
| pSA2         | ~0.9 kb upstream flank of <i>DhPEX3</i> <i>EcoR1-Kpn1</i> fragment                                                 | pNatR             | <i>DhPEX3</i> deletion cassette containing long flanks of <i>DhPEX3</i>                            | This study |
|              | ~1 kb downstream flank of <i>DhPEX3</i> <i>Sac1-Xba1</i> fragment                                                  |                   |                                                                                                    |            |
| pSLV4        | ~1 kb upstream flank of <i>DhMDH3</i> <i>Kpn1-BamH1</i> fragment                                                   | pHygR             | <i>DhMDH3</i> deletion cassette containing long flanks of <i>DhMDH3</i>                            | This study |
|              | ~1 kb downstream flank of <i>DhMDH3</i> <i>Xba1-Sph1</i> fragment                                                  |                   |                                                                                                    |            |
| pSLV19       | ~1 kb upstream flank of <i>DhGPD1</i> <i>Kpn1-Hind3</i> fragment                                                   | pNatR             | <i>DhGPD1</i> deletion cassette containing long flanks of <i>DhGPD1</i>                            | This study |
|              | ~1 kb downstream flank of <i>DhGPD1</i> <i>Not1-Sal1</i> fragment                                                  |                   |                                                                                                    |            |

|        |                                                                                   |        |                                                                                                                                              |            |
|--------|-----------------------------------------------------------------------------------|--------|----------------------------------------------------------------------------------------------------------------------------------------------|------------|
| pSLV14 | ~1 kb upstream flank of <i>DhFOX2</i> fragment <i>Kpn1-Spe1</i> fragment          | pHygR  | <i>DhFOX2</i> deletion cassette containing long flanks of <i>DhFOX2</i>                                                                      | This study |
|        | ~1 kb downstream flank of <i>DhFOX2</i> <i>Sal1-Hind3</i> fragment                |        |                                                                                                                                              |            |
| pSA4   | ~1 kb of upstream flank of <i>DhARG1</i> <i>EcoR1-BamH1</i> fragment              | pKanR  | Used as a backbone plasmid for heterologous expression that integrates into the <i>ARG1</i> locus. KanR selection marker                     | [5]        |
|        | ~1 kb of downstream flank of <i>DhARG1</i> <i>Sal1-Sph1</i> fragment              |        |                                                                                                                                              |            |
| pSA5   | ~1 kb of upstream flank of <i>DhARG1</i> <i>EcoR1-BamH1</i> fragment              | pHygR  | Used as a backbone plasmid for heterologous expression that integrates into the <i>ARG1</i> locus, HygR selection marker                     | [5]        |
|        | ~1 kb of downstream flank of <i>DhARG1</i> <i>Sal1-Sph1</i> fragment              |        |                                                                                                                                              |            |
| pSA6   | <i>HygR</i> , <i>MgACT1</i> promoter-CTG codon optimised GFP-PTS1                 | pSA5   | GFP-PTS1 expression for integration into <i>ARG1</i> locus.<br><br>Also used as a PCR template for N-terminal GFP tagging and HygR selection | This study |
| pSLV35 | <i>MgACT1</i> promoter-CTG codon adapted yemCherry-PTS1, KanR.                    | pSA4   | mCherry-PTS1 expression cassette for integration into <i>ARG1</i> locus                                                                      | [5]        |
| pSLV37 | <i>SsGPD1</i> promoter mCherry-PTS1, <i>SsGPD1</i> terminator, KanR.              | pSLV35 | mCherry-PTS1 expression cassette for integration into <i>ARG1</i> locus                                                                      | [5]        |
| pSLV38 | GAGAGA linker-CTG codon optimised GFP (with stop codon)- <i>SsGPD1</i> terminator | pHygR  | C-terminal GFP tagging cassette to be used in <i>D. hansenii</i> using HygR marker                                                           | This study |

|        |                                                                    |           |                                                                                             |             |
|--------|--------------------------------------------------------------------|-----------|---------------------------------------------------------------------------------------------|-------------|
| pEH116 | <i>TPI1</i> promoter-MCS-GAGAGA linker-GFP- <i>PGK1</i> terminator | ycplac33  | C-terminal GFP tagging plasmid with <i>URA3</i> marker to be used in <i>S. cerevisiae</i> . | Hettema Lab |
| pEH117 | <i>TPI1</i> promoter-MCS-GAGAGA linker-GFP- <i>PGK1</i> terminator | ycplac111 | C-terminal GFP tagging plasmid with <i>LEU2</i> marker to be used in <i>S. cerevisiae</i> . | Hettema Lab |
| pEW324 | <i>TPI1</i> promoter-MCS- <i>PGK1</i> terminator                   | ycplac111 | To express untagged <i>DhPMP47</i> and <i>DhMDH3</i> in <i>S. cerevisiae</i> .              | Hettema Lab |
| pES1   | <i>DhGPD1</i>                                                      | pEH116    | To express <i>DhGpd1</i> -GFP in <i>S. cerevisiae</i>                                       | This Study  |
| pSLV24 | <i>DhPMP47</i>                                                     | pEH117    | To express <i>DhPMP47</i> -GFP in <i>S. cerevisiae</i>                                      | This Study  |
| pSLV39 | <i>DhPMP47</i>                                                     | pEW324    | To express untagged <i>DhPMP47</i> in <i>S. cerevisiae</i>                                  | This study  |
| pSLV41 | <i>TPI1</i> promoter- <i>DhMDH3</i> - <i>PGK1</i> -terminator      | pEW324    | To express untagged <i>DhMDH3</i> in <i>S. cerevisiae</i>                                   | This study  |
| pEL30  | <i>CTA1</i> promoter-MCS- <i>CTA1</i> terminator                   | ycplac33  | Yeast expression vector with <i>CTA1</i> promoter                                           | [42]        |
| pSC120 | <i>CTA1</i> promoter- <i>DhPMP47</i> - <i>CTA1</i> terminator      | pEL30     | To express untagged <i>DhPMP47</i> in <i>S. cerevisiae</i>                                  | This study  |
| pIJL30 | <i>CTA1</i> promoter-MCS- <i>CTA1</i> terminator                   | ycplac111 | Yeast expression vector with <i>CTA1</i> promoter                                           | [43]        |
| pSC132 | <i>CTA1</i> promoter- <i>DhPMP47</i> - <i>CTA1</i> terminator      | pIJL30    | To express untagged <i>DhPMP47</i> in <i>S. cerevisiae</i>                                  | This study  |
| pAS131 | <i>PEX11</i> promoter- <i>PEX11</i> -mRFP- <i>PGK1</i> terminator  | ycplac33  | <i>S. cerevisiae</i> peroxisomal marker                                                     | Hettema Lab |

|                       |                                                                                                                                                  |          |                                                         |      |
|-----------------------|--------------------------------------------------------------------------------------------------------------------------------------------------|----------|---------------------------------------------------------|------|
| pCPT2 <sup>PTS1</sup> | <i>HsCPT2</i> (with mitochondrial targeting sequence deleted and C-terminal extension: KLGSGGEAAVKLSQAKSKL), <i>CTA1</i> promoter and terminator | ycplac33 | CPT2 <sup>PTS1</sup> expression in <i>S. cerevisiae</i> | [16] |
| pCPT2 <sup>cyt</sup>  | <i>HsCPT2</i> (with mitochondrial targeting sequence deleted), <i>CTA1</i> promoter and terminator                                               | ycplac33 | CPT2 <sup>cyt</sup> expression in <i>S. cerevisiae</i>  | [16] |

**Table S4.** The list of primers used in this study.

| Primer Name | 5'→3' sequence                  | Primer Description/Application                                                                                  |
|-------------|---------------------------------|-----------------------------------------------------------------------------------------------------------------|
| VIP49       | GTTTTCCTCAGTCACGACG             | Used for sequencing, colony PCR and linearization of the gene deletion cassettes.                               |
| VIP50       | GGAAACAGCTATGACCATG             |                                                                                                                 |
| VIP3936     | CTCGGTACCTGTATTGAAACCACGCGCCAC  | To clone 1 kb fragment upstream of <i>DhMDH3</i> ORF into the phygR vector.                                     |
| VIP3937     | CATGGATCCTGCTGCTCCGCAAACCTGTAAC |                                                                                                                 |
| VIP3938     | CGCTCTAGACTCTATCGACCAGGGTACTAC  | To clone 1 kb fragment downstream of <i>DhMDH3</i> ORF into the phygR vector.                                   |
| VIP3939     | CTCGCATGCAATCACCTTGCCTACCCAGTC  |                                                                                                                 |
| VIP3932     | GTGAAACATCAGGGAGAGGC            | To confirm cloning/deletion of ~200 bp outside of 1 kb upstream of <i>DhMDH3</i> ORF.                           |
| VIP3933     | TAATCGCTGACAGTGCCATAGC          | To confirm cloning/deletion of ~200 bp outside of 1 kb downstream of <i>DhMDH3</i> ORF.                         |
| VIP3934     | TGAACTCGACCGTGCCAATTG           | To confirm deletion of <i>DhMDH3</i> or the integration of tagging <i>DhMDH3</i> ORF construct into the genome. |
| VIP3935     | AGCATTAGGACACGCCTTAC            |                                                                                                                 |

|         |                                                    |                                                                                                 |
|---------|----------------------------------------------------|-------------------------------------------------------------------------------------------------|
| VIP3940 | CACTGGCAAACGTGTGATGGAC                             | To confirm the integration of <i>HygR</i> marker into the genome.                               |
| VIP3941 | GCCATGTAGTGTATTGACCG                               |                                                                                                 |
| VIP3983 | TAGGAACACTGCAAGCGCATC                              | To confirm the integration of <i>KanR</i> marker into the genome.                               |
| VIP3984 | AACAGCGATCGCGTATTTTCG                              |                                                                                                 |
| VIP4112 | AACACATACATAAACGAGCTCAAAATGTCACAAT<br>ATAGAGCCAATC | To clone <i>DhGPD1</i> into pEH116 (plasmid used for expression in <i>S. cerevisiae</i> cells). |
| VIP4113 | CAGGTCGACTCTAGAGGATCCTTTGAATAATGAAT<br>GGTCTCC     |                                                                                                 |
| VIP4089 | CATGGGTACCACTATCCCCACTGGCACTTG                     | To clone 1 kb fragment upstream of <i>DhFOX2</i> ORF into the phygR vector.                     |
| VIP4090 | CATGACTAGTTGTTAAGTTCCTTGCCGCTC                     |                                                                                                 |
| VIP4127 | GATCGTCGACAGGCTAAGATCTAAGCTAGC                     | To clone 1 kb fragment downstream of <i>DhFOX2</i> ORF into the phygR vector.                   |
| VIP4100 | CTAGAAGCTTGTGGCCACCAGAAGTCTTTC                     |                                                                                                 |
| VIP4093 | TTCTAACCTGTCCCATCAAG                               | To confirm cloning/deletion of ~200 bp outside of 1 kb upstream of <i>DhFOX2</i> ORF.           |
| VIP4094 | CAACAATAACATCCCATGCCG                              | To confirm cloning/deletion of ~200 bp outside of 1 kb downstream of <i>DhFOX2</i> ORF.         |
| VIP4095 | ATCAGCAACGGCAATTCCAC                               | To confirm deletion of <i>DhFOX2</i> .                                                          |
| VIP4096 | ATGGTATGTCTGCTAAGGTC                               |                                                                                                 |
| VIP81   | GTTTGTATTCTTTTCTTGC                                | Anneals to the <i>TPI1</i> promoter in pEH116, used for sequencing.                             |

|         |                                                           |                                                                                                                                                                    |
|---------|-----------------------------------------------------------|--------------------------------------------------------------------------------------------------------------------------------------------------------------------|
| VIP272  | CCCATTAACATCACCATC                                        | Reverse primers within <i>GFP</i> ORF, used to confirm expression and sequencing.                                                                                  |
| VIP466  | TTGTCGGCCATGATGTATACG                                     |                                                                                                                                                                    |
| VIP4162 | CATGGGTACCCATCGATGCCAATACAACCG                            | To clone 1 kb fragment upstream of <i>DhGPD1</i> ORF into the pNatR vector.                                                                                        |
| VIP4163 | CATGAAGCTTGGCTCTATATTGTGACATTGG                           |                                                                                                                                                                    |
| VIP4164 | CATGGCGGCCGCAGATCAGCAACGTTAAGCCG                          | To clone 1 kb fragment downstream of <i>DhGPD1</i> ORF into the pNatR vector. VIP4165 was also used to confirm the integration of <i>GPD1</i> tag into the genome. |
| VIP4165 | CATGGAAGCTCATCCAGATCACCGGATAGAG                           |                                                                                                                                                                    |
| VIP4166 | AACTCGCAACTGGACAAGAG                                      | To confirm cloning/deletion of ~200 bp outside of 1 kb upstream of <i>DhGPD1</i> ORF.                                                                              |
| VIP4167 | GGCCAAAGGTTACACGTAAC                                      | To confirm cloning/deletion of ~200 bp outside of 1 kb downstream of <i>DhGPD1</i> ORF.                                                                            |
| VIP4168 | CGAAATTGCTCTGGTGGTTG                                      | To confirm deletion of <i>DhGPD1</i> (VIP4169 was also used to check the integration of <i>GPD1</i> into the genome).                                              |
| VIP4169 | GGTGACAATGCTAAATCGGC                                      |                                                                                                                                                                    |
| VIP3397 | AGCACACACCCACAACAAC                                       | Within the <i>NatR</i> ORF. To check the integration of <i>SAT1</i> marker into the genome.                                                                        |
| VIP3901 | AGACAGCTCCTTGGCATAACG                                     |                                                                                                                                                                    |
| VIP4257 | AACACATACATAAACGAGCTCAAAATGGCCGAAA<br>TTGAAGAACTTGCCC     | To clone <i>DhPMP47</i> ORF into pEH117 (plasmid used for expression in <i>S. cerevisiae</i> cells).                                                               |
| VIP4238 | CCTTTACTCATTGCACCCGCCCTGCTCCCTGCAGT<br>TTAACAGCATCTCTCTTC |                                                                                                                                                                    |

|         |                                                                                                              |                                                                                                                                                                                        |
|---------|--------------------------------------------------------------------------------------------------------------|----------------------------------------------------------------------------------------------------------------------------------------------------------------------------------------|
| VIP4398 | GTGTTGAAGAATTGACTAATAGGTCAGAAAAGGT<br>AGTAACAAAGAGTAACAAACAACAAAACGGGGA<br>TCCATGCATACTAG                    | To generate <i>DhPMP47</i> deletion construct using either <i>hygR</i> or <i>KanR</i> markers in pHygR or pKanR, respectively.                                                         |
| VIP4462 | CGTCAACATTTTAAAAATGGCTTGATAATATATTGA<br>AGTATTTAACCAAATGCATACTTATATACTCCTGC<br>AGGTCG ACTCTAGAG              |                                                                                                                                                                                        |
| VIP4460 | CGATAAGACTGCAAGTGTCGTGTATATAAATTGCG<br>TCGGTATAGCTGACAAAATCAGATAATGAAGAAA<br>TCGGGGATCCATGCATACTAG           | To generate <i>DhNPY1</i> deletion construct using either <i>hygR</i> or <i>KanR</i> markers in pHygR or pKanR respectively.                                                           |
| VIP4461 | ATACACTTTATAGTCTATAGAATAAAAATTTAAGTA<br>TTTTCCGATTCAATTCTAGAAATGTAACAGCCATC<br>CTGCAGGTGCACTCTAGAG           |                                                                                                                                                                                        |
| VIP4425 | ACGTTACAGACTCGTTCTGC                                                                                         | Outside of the flanks used for deleting <i>DhPMP47</i> ORF. To confirm <i>DhPMP47</i> deletion (VIP4426 was also used to confirm the integration of <i>PMP47</i> tag into the genome). |
| VIP4426 | CTATGCGGATGTTTATGCGG                                                                                         |                                                                                                                                                                                        |
| VIP4427 | CTTGTTTCGCAGGTGTGTTAC                                                                                        | Within the <i>DhPMP47</i> ORF. To confirm <i>DhPMP47</i> deletion (VIP4427 was also used to confirm the integration of <i>PMP47</i> tag into the genome).                              |
| VIP4428 | GACAATCGCTTTGAACGTAG                                                                                         |                                                                                                                                                                                        |
| VIP4513 | AACAGCTTCCAGCATGCTTC                                                                                         | To confirm <i>DhNPY1</i> deletion (VIP4513 was also used to confirm the integration of <i>NPY1</i> tag into the genome).                                                               |
| VIP4514 | CTCTATGTCCGCATATGAGG                                                                                         |                                                                                                                                                                                        |
| VIP4515 | CTGGGTGTGGTTCTAGAGTC                                                                                         | To confirm <i>DhNPY1</i> deletion. (VIP4516 was also used to confirm the integration of <i>NPY1</i> tag into the genome).                                                              |
| VIP4516 | TTACCACTGCTCCAGTCTTC                                                                                         |                                                                                                                                                                                        |
| VIP4517 | ACGGATCGAATTCGTGGAAATCTATCATTAGTAGC<br>CAGTTATCAATCTAATAAGTCAAGACGAAGTTATG<br>GAATGATCCAGAGG                 | To tag <i>DhMDH3</i> in <i>D.hansenii</i> genome.                                                                                                                                      |
| VIP4519 | TAATAACGACAATGGTTGCCCAATGCCTCCTGCTG<br>CTCCGCAAACTGTAACCTTTAACCATTGCGCCAGCT<br>CCTGCACCTTTGTATAGTTCATCCATGCC |                                                                                                                                                                                        |

|         |                                                                                                                                       |                                                                                                                                              |
|---------|---------------------------------------------------------------------------------------------------------------------------------------|----------------------------------------------------------------------------------------------------------------------------------------------|
| VIP4559 | CGAGGCCCATCTTCACATGTGACTCAAAGTCATAT<br>AACCATGATGGGGTACTAAATGTTACTTAAACGGA<br>TCGAATTCGTGGAAATC                                       | To extend the homology arms of <i>DhMDH3</i> tagging construct.                                                                              |
| VIP4560 | GCAACCCCATTTGCATTAACCACATCAAATAACGA<br>CAATTCGCTCACTTGCGGGTTTAACTTTAATAATAA<br>CGACAATGGTTGCCC                                        |                                                                                                                                              |
| VIP465  | CCACACAATCTGCCCTTTTCG                                                                                                                 | To confirm the integration of GFP tags in <i>D. hansenii</i> .                                                                               |
| VIP467  | CCATGTGTAATCCCAGCAGC                                                                                                                  |                                                                                                                                              |
| VIP4410 | CATCTGCAGCTATAATTCGAACCAGTTACG                                                                                                        | Complementary to the sequence near the end of <i>DhMDH3</i> ORF. To confirm the integration of <i>MDH3</i> tag in <i>D. hansenii</i> genome. |
| VIP4664 | TTTGGAATGGGGCCCGCCATTAGCCCGATAAGAC<br>TGCAAGTGTCTGTATATAAATTGCGTCGGTATAG<br>CTGACAAAATCAGATAATGAAGAAATCGAAGTTA<br>TGGAATGATCCAGAGG    | To tag <i>DhNPY1</i> in <i>D.hansenii</i> genome.                                                                                            |
| VIP4665 | ATAATAACTATCTTGTTTCAGCTTACTGATTGATGA<br>TTGAAATCGAATCGAAAGTCTTGGTATCTTACTGA<br>AAACGCCCATTTGCGCCAGCTCCTGCACCTTTGTAT<br>AGTTCATCCATGCC |                                                                                                                                              |
| VIP4704 | ACGTATCCATCTCATCTTAGATAAGTTCATCTTCGT<br>ATCAGAAAGGCGTAAGTGTAAGTATTATTGAAAGAT<br>TTGGAATGGGGCCCGCCATTAG                                | To extend the homology arms of <i>DhNPY1</i> tagging construct.                                                                              |
| VIP4705 | AACTATCTCTGCTCCAAAGTATGAGCTATGATCTT<br>GTCCATGAATAGGATTTAATACGTTACCCGACATC<br>TTATAATAACTATCTTGTTTCAGC                                |                                                                                                                                              |
| VIP4751 | CTGGCTCCGTCAAATTGGTCCAAATCTTCAAATTA<br>ATGTGAAAATGAAGAAGAATGCTGTAAAGGATC<br>CGGTGCAGGAGCTGGCGCAGTCGACCTCGAGATG                        | To tag <i>DhPMP47</i> in <i>D.hansenii</i> genome.                                                                                           |
| VIP4752 | CTCTCGGCAACTGACGTCAACATTTTAAAATGGCT<br>TGATAATATATTGAAGTATTTAACCAAATGCATAC<br>TTATATACTCTACCCAATCTATCTTCTGAGGTG                       |                                                                                                                                              |
| VIP4753 | AATTGATTCAATCGATCACTACAGCCGCGTTTTTAT<br>TCTACTTTAAAGAGGAATTATTAAGTGGCTCCGTC<br>AAATTGGTC                                              | To extend the homology arms of <i>DhPMP47</i> tagging construct.                                                                             |



|         |                                                                                                                         |                                                                                                                                                                                                                  |
|---------|-------------------------------------------------------------------------------------------------------------------------|------------------------------------------------------------------------------------------------------------------------------------------------------------------------------------------------------------------|
| VIP4754 | CTCATTATTGCGCAGAAAAATGAAGCATAAATCC<br>AGCTACTGCGCATATGTTGCAGTATCACCAAATTT<br>TTCGGGCTCTCGGCAACTGACGTCAAC                |                                                                                                                                                                                                                  |
| VIP4780 | CATGCGGCCGCGACCCGCTCTTGACGGTTAC                                                                                         | To clone <i>MgACT1</i> promoter-CTG codon optimized <i>mCherry</i> into pSA5. VIP4781 introduces PTS1 signal (PLH-SKL) to the end of <i>mCherry</i> , thus creating for peroxisomal marker <i>mCherry-PTS1</i> . |
| VIP4781 | CAGGTCGACCTAGAGTTTTGAGTGCAGTGGTTTAT<br>ATAATTCATCCATACCACC                                                              |                                                                                                                                                                                                                  |
| VIP4798 | CATGCGGCCGCGCAAGTTATATCTGATGTCTC                                                                                        | To amplify <i>PsGPD1</i> promoter and clone it into pSLV35 (for replacing with <i>MgACT1</i> promoter).                                                                                                          |
| VIP4799 | CAGCTGCAGGATTGATTATGACTATAATGTGTG                                                                                       |                                                                                                                                                                                                                  |
| VIP3967 | CAATGAATTCCCTGTAGTTGTAGATGCCAC                                                                                          | To clone 916 bp fragment upstream of <i>DhARG1</i> ORF into pKanR as <i>EcoRI-BamHI</i> fragment                                                                                                                 |
| VIP3968 | CAATGGATCCGGCAATAGTGATCGGATTG                                                                                           |                                                                                                                                                                                                                  |
| VIP3969 | CAATGTGCGACTAATCAGCAGTCCAGTACTC                                                                                         |                                                                                                                                                                                                                  |
| VIP3970 | CAATGCATGCATGGGGACAAGTTGGCTAGATG                                                                                        |                                                                                                                                                                                                                  |
| VIP4016 | AGGAGCGCGGTATATAGATC                                                                                                    | Sequence outside of ~1 kb flanks of <i>DhARG1</i> . To confirm the integration of mCherry into the <i>ARG1</i> locus.                                                                                            |
| VIP4019 | CAGCGGGTATAGTTGGAATG                                                                                                    |                                                                                                                                                                                                                  |
| VIP4793 | GAAGATGGTGGTGTGTTAC                                                                                                     | To confirm the integration of mCherry into <i>DhARG1</i> locus.                                                                                                                                                  |
| VIP4877 | TCCATTATTTGAAGCTACTTATCAAATTATATACG<br>GTGATGAATCTATTCAAACTTGCCAACTTATTA<br>GAAGACCATTCAATTCAAGAATTCGAGCTCGG<br>TACCCG  | To tag <i>DhGPD1</i> in <i>D. hansenii</i> genome.                                                                                                                                                               |
| VIP4878 | CATGCTACTGGTTGTCTAACCAAAAAAAAAAAGGC<br>GTCAAATGAAACGCATCTAATATACATGAAACG<br>GCTTAACGTTGCTGATCTACCTGCAGGTCGACTCT<br>AGAG |                                                                                                                                                                                                                  |

|         |                                                                                                                                      |                                                                                                                          |
|---------|--------------------------------------------------------------------------------------------------------------------------------------|--------------------------------------------------------------------------------------------------------------------------|
| VIP4879 | AGAAGCAGAAAAGAAATTATTGAATGGCCAATCC<br>TCGCAAGGTATCATCACTGCAAAGGAAGTCCATG<br>AGTTATTAAGCAATGTTGGTAAGACTGATCAATTC<br>CCATTATTTGAAGCTAC | To extend the homology arms of <i>DhGPD1</i> tagging construct.                                                          |
| VIP4880 | TCGTATGTATTATAGTAATAATAAAAAATCAATGAT<br>ATTGTAATATTCTGTATATTTTCTATGTGATAAATA<br>AATAACGACAACTTAAAAATAAATTTGTCATGCT<br>ACTGGTTGTCTAAC |                                                                                                                          |
| VIP3286 | TGAAGCTTCGTACGCTGCAG                                                                                                                 | To amplify CaACT1 promoter-CTG codon adapted SAT1 ORF-CaURA3 terminator from pFASAT1 and clone it into pBLUESCRIPT KS(+) |
| VIP3287 | GCTGGATCCATGCAGGACCACCTTTGATTG                                                                                                       |                                                                                                                          |
| VIP3856 | CACTGGTACCTGAAGCACTCGAGTTGAAG                                                                                                        | To clone ~1 kb fragment upstream of <i>DhPEX3</i> ORF into pNatR                                                         |
| VIP3857 | CAATGAATTCGCATGCTTAGTAGTTTTGCTTG                                                                                                     |                                                                                                                          |
| VIP3858 | CAGTTCTAGACTTAATGACCTCTTCACATCG                                                                                                      | To clone ~1 kb fragment downstream of <i>DhPEX3</i> ORF into pNatR                                                       |
| VIP3859 | CAATGAGCTCTTCCTACTACCAGACCTACC                                                                                                       |                                                                                                                          |
| VIP3872 | CGCTGAAGCTGATGTAGATC                                                                                                                 | To confirm the <i>PEX3</i> deletion.                                                                                     |
| VIP3873 | GTGATTAATCCTGGCGACTC                                                                                                                 |                                                                                                                          |
| VIP3901 | AGACAGCTCCTTGGCATAACG                                                                                                                | Within the <i>SAT1</i> ORF. To confirm the integration of SAT1 marker into the genome.                                   |
| VIP3397 | TAGCACACACCCACAACAAC                                                                                                                 |                                                                                                                          |
| VIP5180 | CATGCTGCAGCTATAATTTCGAACCAGTTACG                                                                                                     | To clone <i>DhMDH3</i> ORF into pEW324 plasmid.                                                                          |
| VIP5182 | CATGGAGCTCAAAATGGTTAAAGTTACAGTTTGCG<br>G                                                                                             |                                                                                                                          |

|         |                                                   |                                                                                                                                                                                                                                                                            |
|---------|---------------------------------------------------|----------------------------------------------------------------------------------------------------------------------------------------------------------------------------------------------------------------------------------------------------------------------------|
| VIP5183 | GACCCGATACTTTCTTCGCAACTGATGCTGTAGCA<br>TGTACCAAAG | To change the CTG codon present in <i>DhMDH3</i> ORF.                                                                                                                                                                                                                      |
| VIP5184 | CTTTGGTACATGCTACAGCATCAGTTGCGAAGAAA<br>GTATCGGGTC |                                                                                                                                                                                                                                                                            |
| PMP47f  | GGGGGAGCTCATGGCCGAAATTGAAGAACT3                   | To express untagged <i>DhPMP47</i> in <i>S. cerevisiae</i> , the PMP47 ORF was PCR amplified from pSLV24 plasmid with the oligonucleotides and subcloned using SacI and XbaI restriction sites in pEL30 or pIJL30 vector downstream of the oleate-inducible CTA1 promoter. |
| PMP47r  | GGGGTCTAGATTATTAAACAGCATTCTTCTTCA                 |                                                                                                                                                                                                                                                                            |

**Table S5.** The sequences of promoters, terminators and antibiotic resistance ORFs used in this study.

| Name                                      | DNA sequence                                                                                                                                                                                                                                                                                                                                                                                                                                                                                                                               |
|-------------------------------------------|--------------------------------------------------------------------------------------------------------------------------------------------------------------------------------------------------------------------------------------------------------------------------------------------------------------------------------------------------------------------------------------------------------------------------------------------------------------------------------------------------------------------------------------------|
| <i>S. stipitis</i> TEF1 promoter region   | GGAATGATCCAGAGGCGCGACATTTATGCAGACAATTTGTGTTTTGTCGCAAACGATGTTATAGC<br>GAAATTTTTCACTCTGTCAGATAAATGGATTTTGTCAAAAGGGGGAAGTAGAAGGAGAATGGGC<br>CCGAGATGTTCTGCCAAATTCTCAGTAGCATAATGTGAAAGAAGCCCTTACATTGTCCAGCCTCT<br>GGCATCATTA AAAAACCGTAGCGGAAACCAATTGTCTCTGTCTTCCCTGGCACACCTGGTAGCC<br>CCATCCAGTTGTAGTACATCTCACACGCTGGCAACTTGGGACAATCAGCAACTTTTTTTCTTTTA<br>ATTTTTTCAGCGCGACATTTTGCCTCTTCTGCGAGAACAGACTTTTTACCTCCATCTCACCCCCCT<br>TTGCACTTATATAAATTGGACCAGTTCCTCCATTGTAGAAAAAATTTGCTGGACCTTTTTCTCTT<br>TTTTTGTCTTTAGTTTCATACAATCTAAGTCTATCTACA |
| <i>S. stipitis</i> TEF1 terminator region | GCTGATTAATTTACGTATATTCAGTTTAATATCAATACGTTAGCTACATTTCCAATGAACGATACT<br>AGATATTGTTTAGGATTATTGAACTGGTATAGATAATTTTAGTGTATATTCATGTACTTGATAAAT<br>GTAATAATATGTGAAAATGTAGTTGTACATTAAGTATAGACAACATGCTGGAGTATATGGCATT<br>AAGGTTGCTACAAAGTAGAAGCAACCTAGACACACCTCAGAAGATAGATTGGG                                                                                                                                                                                                                                                                      |
| <i>S. stipitis</i> ACT1 promoter region   | AAGTCCGAGCTTCAGCAAACGCTTGTGTGGAAAGCTCCACCAGTGCTAAGGTGGAGTCGGGTTG<br>GGGAAATGTCGCGAACGACACAATTTTTCAGCTCAGACGGCACCCACCAAAGAATGATAGCA<br>GATAGCCTGGAGAGAGCCCAGATCAGCCAAAGAATAGCACTAATATACAAATAATACGAAACC<br>CCAAAATACGACATTGTCCTCCCTTATACACACAGATGTGGGCTATTTGTGGATGCCAAAATATA<br>CCCAATCATGTGCTATCTAGTGTCTTTGACTTATCTTCCACATTGTTCCCTCTGTGTAGCATGAG<br>CACTCAGCAATGTGCGGTGTCGTGCAAATTTTCTTGTGTGCGACTTTCCACCCACCGATATTT<br>ATAACCAACGCAGTTTTTCTTTTCGTGAGCACAATCCCTTTTCTTCTTTTTCAGTAGGTTTCTGTA<br>ATATTAGTACAATCCCTTATATTATAATCATATAGATCAAAC     |
| <i>S. stipitis</i> ACT1 terminator region | AACCACTTGCAAAAATCCTTTGTATTCTTGTCTGCAAACATTTTGCCAATCTCTTATCTTTCTACG<br>ATGTTGAAGAACATACATTTTTGTAGTCCAGCTTGTATCCTTTTTTATTAAATAAAAAATTTTA<br>TTGTTAAAGTTGTTTTCTTCTTTGTCTGTCCTGTTTAACTCATATATATTCTATATATTACAGAAA<br>GAAAGTAGATCATCTAAAATAAACATTTATTTGATGAGACAAAGTAGGTTTTTGAATACAATG<br>TAGCATCCTCTAATATACAATAGAGTTGTTTTATAAAAGCGATACATTTAATATTATGACAGGACT<br>GGTGAAGTGTATAGAATTGTGCTAATCTGGCAAACGAACCAAGAAGACGTTAAAGCAAATAGT<br>GCA                                                                                                            |

|                                         |                                                                                                                                                                                                                                                                                                                                                                                                                                                                                                                                                                                                                                                                                                                                                                                                                                                                                                                                                                                                                                                                                                                                  |
|-----------------------------------------|----------------------------------------------------------------------------------------------------------------------------------------------------------------------------------------------------------------------------------------------------------------------------------------------------------------------------------------------------------------------------------------------------------------------------------------------------------------------------------------------------------------------------------------------------------------------------------------------------------------------------------------------------------------------------------------------------------------------------------------------------------------------------------------------------------------------------------------------------------------------------------------------------------------------------------------------------------------------------------------------------------------------------------------------------------------------------------------------------------------------------------|
| <i>S. stipitis</i> GPD1 promoter region | ATCTGATGTCTCAAATAAGGTATCAAGACAACGAATCAATGATCAACCAAGAAAGATTATTAGA<br>GAAATTGGATGGATCAGCTGTGCTTGTGGAAACACTGATACGACATGCCAGTAAACGAAGTAGA<br>AAAACTAACTGTATATTCGCTAACAAAAAAATTTGATTATTTTATAGACATCGTAAATGGGGCTG<br>TAGCCCTAATTATTTTTCATTTCTCGTGATCTGCACGTGTACTGTTGATTTTTTGTGCGATTGAAAT<br>TATATTGTGCTGTTATCTTAATAAAATCAGTCATACCTTTTTTTTTTGGGTTTTTGTGTTTAATTTG<br>TGATAAACATCCCATGAGGAACAGCGAGAAAGTTTTTGTGTTCACTTTCTCGTTCAACTTTTGC<br>AAAGTAAAGTAAAGAAAAAAATTTTCCCTCGTCATCTTGATTTTTACTTCTTCTTCTTCTTCTC<br>TTTTCTTTCTTCACACATTATAGTCATAATCAATC                                                                                                                                                                                                                                                                                                                                                                                                                                                                                                                                                                                           |
| CTG-adapted<br>hygR                     | ATGGGTAAAAAGCCTGAACTCACCGCGACGTCTGTGCGAGAAGTTTCTAATCGAAAAGTTCGACA<br>GCGTCTCCGACCTAATGCAGCTCTCGGAGGGCGAAGAATCTCGTGCTTTCAGCTTCGATGTAGGA<br>GGGCGTGGATATGTCCTACGGGTAAATAGCTGCGCCGATGGTTTCTACAAAGATCGTTATGTTTAT<br>CGGCACTTTGCATCGGCCGCGCTCCCGATTCCGGAAGTGCTTGACATTGGGGAATTTAGCGAGAG<br>CCTAACCTATTGCATCTCCCGCCGTGCACAGGGTGTACGTTGCAAGACCTACCTGAAACCGAAC<br>TACCCGCTGTTCTACAGCCGGTCGCGGAGGCCATGGATGCGATCGCTGCGCCGATCTTAGCCAG<br>ACGAGCGGGTTCGGCCCCATTTCGGACCGCAAGGAATCGGTCAATACTACATGCGCGTGAATTCAT<br>ATGCGCGATTGCTGATCCCCATGTGTATCACTGGCAAATCTGTGATGGACGACACCGTCAGTGCGT<br>CCGTCGCGCAGGCTCTCGATGAGCTAATGCTTTGGGCCGAGGACTGCCCCGAAGTCCGGCACCTC<br>GTGCACGCGGATTTCCGGTCCAACAATGCTTAACGGACAATGGCCGCATAACAGCGGTCAATTGA<br>CTGGAGCGAGGCGATGTTCCGGGATTCCCAATACGAGGTCGCCAACATCTTCTTCTGGAGGCCGT<br>GGTTGGCTTGATGGAGCAGCAGACGCGCTACTTCGAGCGGAGGCATCCGGAGCTTGCAGGATC<br>GCCGCGGCTCCGGGCGTATATGCTCCGATTGGTCTTGACCAACTCTATCAGAGCTTGGTTGACG<br>GCAATTTTCGATGATGCAGCTTGGGCGCAGGGTCGATGCGACGCAATCGTCCGATCCGGAGCCGG<br>GACTGTCGGGCGTACACAAATCGCCCGCAGAAGCGCGGCCGTCTGGACCGATGGCTGTGTAGAA<br>GTACTCGCCGATAGTGGAACCGACGCCCCAGCACTCGTCCGAGGGCAAAGGAATAA |
| CTG-adapted<br>KanR                     | ATGGGTAAAGGAAAAGACTCACGTTTCGAGGCCGCGATTAAATTCCAACATGGATGCTGATTTATA<br>TGGGTATAAATGGGCTCGCGATAATGTCGGGCAATCAGGTGCGACAATCTATCGATTGTATGGGA<br>AGCCCGATGCGCCAGAGTTGTTTCTAAAACATGGCAAAGGTAGCGTTGCCAATGATGTTACAGAT<br>GAGATGGTCAGACTAACTGGCTAACGGAATTTATGCCTCTTCCGACCATCAAGCATTTTATCCGT<br>ACTCTGATGATGCATGGTACTCACCCTGCGATCCCCGGCAAAACAGCATTCCAGGTATTAGA<br>AGAATATCCTGATTCAGGTGAAAATATTGTTGATGCGCTTGCAGTGTTCTACGCCGTTGCATTC<br>GATTCCTGTTTGTAATTGTCCTTTTAACAGCGATCGCGTATTTCTGCTCGCTCAGGCGCAATCACG<br>AATGAATAACGGTTTGTTGATGCGAGTGATTTTGATGACGAGCGTAATGGCTGGCCTGTTGAAC<br>AAGTCTGGAAGAAATGCATAAGCTATTGCCATTCTCACCGGATTTCAGTCGTCATCATGGTGAT<br>TTCTCACTTGATAACCTTATTTTACGAGGGGAAATTAATAGGTTGTATTGATGTTGGACGAGTC<br>GGAATCGCAGACCGATACAGGATCTTGCCATCCTATGGAATGCCTCGGTGAGTTTTCTCCTTCA<br>TTACAGAAACGGCTTTTCAAAAATATGGTATTGATAATCCTGATATGAATAAATTGCAGTTTCAT<br>TTGATGCTCGATGAGTTTTTCTAA                                                                                                                                                                                                                                                   |
| CTG codon-<br>adapted mCherry-<br>PTS1  | ATGGTTTCAAAGGTGAAGAAGATAATATGGCTATTATTAAGAATTTATGAGATTTAAAGTTCA<br>TATGGAAGGTTTCAGTTAATGGTCATGAATTTGAAATTGAAGGTGAAGGTAGACCATATG<br>AAGGTACTCAAAGTCTAAATTGAAAGTTACTAAAGGTGGTCCATTACCATTGCTTGGGATATTC<br>TGTCACCACAATTTATGTATGGTTCAAAGCTTATGTTAAACATCCAGCTGATATTCCAGATTATT<br>TAAAATTGTCATTTCCAGAAGGTTTTAAATGGGAAAGAGTTATGAATTTGAAGATGGTGGTGTG<br>TACTGTTACTCAAGATTCATCATTACAAGATGGTGAATTTATTTATAAAGTTAAATTGAGAGGTA<br>CTAATTTTCCATCAGATGGTCCAGTTATGCAAAAAAAACTATGGGTTGGGAAGCTTCATCAGAA<br>AGAATGTATCCAGAAGATGGTGCTTTAAAAGGTGAAATTAACAAAGATTGAAATTAAGATG<br>GTGGTCATTATGATGCTGAAGTTAAACTACTTATAAAGCTAAAAAACAGTTCAATTACCAGGT<br>GCTTATAATGTTAATTAATTTGGATATTACTTCACATAATGAAGATTATACTATTGTTGAACAA<br>TATGAAAGAGCTGAAGGTAGACATTCACTGGTGGTATGGATGAATTATATAAACCACTGCACTC<br>AAAATCTAG                                                                                                                                                                                                                                                                                                                                                   |

|                                                     |                                                                                                                                                                                                                                                                                                                                                                                                                                                                                                                                                                                                                                                                                                                                                                                                                                                                                                                                                                                                                                                                                                                                                                                                                                                                                                                                                 |
|-----------------------------------------------------|-------------------------------------------------------------------------------------------------------------------------------------------------------------------------------------------------------------------------------------------------------------------------------------------------------------------------------------------------------------------------------------------------------------------------------------------------------------------------------------------------------------------------------------------------------------------------------------------------------------------------------------------------------------------------------------------------------------------------------------------------------------------------------------------------------------------------------------------------------------------------------------------------------------------------------------------------------------------------------------------------------------------------------------------------------------------------------------------------------------------------------------------------------------------------------------------------------------------------------------------------------------------------------------------------------------------------------------------------|
| CTG codon-adapted GFP                               | ATGAGTAAAGGAGAAGAAGCTTTTCACTGGAGTTGTCCCAATTCTTGTGAATTAGATGGTGATGTT<br>AATGGGCACAAATTTTCTGTCAGTGGAGAGGGTGAAGGTGATGCAACATACGGAAAACTTACCC<br>TTAAATTTATTTGCACTACTGGAAAACTACCTGTTCCATGGCCAACACTTGTCACTACTTTCACTTA<br>TGGTGTTCATGCTTTTCAAGATACCCAGATCATATGAAACGGCATGACTTTTTCAAGAGTGCCAT<br>GCCCCAAGGTTATGTACAGGAAAGAAGCTATATTTTTCAAAGATGACGGGAAGTACAAGACACGT<br>GCTGAAGTCAAGTTTGAAGGTGATACCCTTGTTAATAGAATCGAGTTAAAAGGTATTGATTTTAA<br>AGAAGATGGAAACATTCTTGGACACAAATTGGAATACAAGTATAACTCACACAATGTATACATC<br>ATGCGACACAAACAAAAGAATGGAATCAAAGTTAACTTCAAATTAGACACAACATTGAAGAT<br>GGAAGCGTTCAACTAGCAGACCATTATC                                                                                                                                                                                                                                                                                                                                                                                                                                                                                                                                                                                                                                                                                                                                              |
| <i>M. guilliermondii</i><br>ACT1 promoter<br>region | ACCCGCTCTTGACGGTTACCCAATGCGGTTATAAGCCAACAGTCTGTTGTGCGACTAGGCTCGCTT<br>GGCACCTGCACAGATGCTGCGACAGCTCTCACGCACAGAAATGGTCACCTAGAGTCGATTTCCGC<br>GCCTCGTTGCCGCCGGTCTCCGCGCGGTGAATCCTGTACATAGTCATCTCCGATTCACTTTCACTA<br>GACGAATCCGGCACATGAGTGATCCGGCGTGCACACAATAGCAATCTCCCTGCACACACCGGGA<br>CGCGATTGCCGGGTAATCCCTGGTTGGGTCGTTTCTGCTCGTTGTTTGATACCAGCGCTACCCCC<br>TTTCGAAAAATTTACTTTTGACTAGGTATTAATATAGTATAGCAA                                                                                                                                                                                                                                                                                                                                                                                                                                                                                                                                                                                                                                                                                                                                                                                                                                                                                                                                         |
| <i>C. albicans</i> ACT1<br>promoter region          | GTCGAGCGTCAAAAAGTAGAGAATAATAAAGAAAACGATCTTTTCAAAAAGAAAAAACCTTTTAG<br>TTTTCTTTGTTGTTGTTGTTGGGTGTTGCTATTTATATTATATAGTTTACTCATAATACCATAAAAT<br>ATTCGGTTTGATTAGGTTATTTTAATAAGCTAATTTGTTTCTAATCGTGTAATTTATGCTGTGTATAT<br>TAAGTAGTGTGTGCACTGCCAAAAATGTTTGTGTTTATAGTCGGTTAAAGAGAAAAAAGAAAA<br>AAAGATCCATACACACACGTTAATTAGTTGTTCAACGTAATACACTCATATTTTGTCTTATTTGCT<br>TTCGGTGCCTGTTCTCACCAAGATTTATTGCCAACGAAACAATTTTTTTTTATATTTTCAGATTTT<br>TCTTTTTTCTTTCTTTCTTTCTAATTTTCACTCCTGGTTTTCTTTCTTTCTTAGAAACATTATCT<br>CGATATTAATATTAATAAAAAATATAATCATTCAAA                                                                                                                                                                                                                                                                                                                                                                                                                                                                                                                                                                                                                                                                                                                                                                                                    |
| CTG codon-adapted SAT1                              | ATGGACGGTGGTATGTTTTAGTTTAGCTTCAATTCTAATTGATTGATTAAATCAGTTGATTGGTTTCA<br>ATATGACAAATGGGTAGGGTGGGAAAACTTCATTTTCAATTCAGATCAAACCTTTTTGTTGTCGAC<br>ATAATATTTCTCGTTTGGGATGTTACTGTCACATTAATAATACACACACATCAGCTTATAATTTTG<br>AAAGTAATTTATCAGATATGTTGTGACGATCAATGGAAATGGCTAACTTCAATGTATCTGTTCTTC<br>CCCTTTTTCAAAGTTCACGTTTTTTGATTGATTGATTGATCTGTCCGCGAGTGGTTTCAAACCATTC<br>GGTGAGTAATCCTATCAATCAATGTTACGACAAAAGGCTCAATATTCAAATTTGCAATGTTTTAT<br>GTTTTCTACGTGTAATTTGTGCAAGGCAATTGATTCAACATTGCTTTTGGTGTGTTGACGAGTTTCTA<br>GTTTGGACTTGTGTTGTTATCTGGGCTATACAGATTTCCCGGCTCACTATGAATTTTTTTTTTCGACG<br>CTCAGTGCACACAAGTATAAACAACACAAACACAAACACAGCAAGAAAAAAGAAAAACGAAC<br>ATTGAATTGAAACCAAGCCAAGTGAATAATTCCTTATTTAAATGACTGTCATACTAACCATTTTT<br>ATAGAAGAAGTTGCTGCTTTAGTTATCGATAACGGTCTCATATGAAAATTTCCGGTGATCCCTGAG<br>CAGGTGGCGGAAACATTGGATGCTGAGAACCATTTCATTGTTTCGTGAAGTGTTCGATGTGCACCT<br>ATCCGACCAAGGCTTTGAAGTATCTACCAGAAGTGTGAGCCCTACCGGAAGGATTACATCTCGG<br>ATGATGACTCTGATGAAGACTCTGCTTGTATGGCGCATTCATCGACCAAGAGCTTGTGCGGAAG<br>ATTGAATCAACTCAACATGGAACGATCTAGCCTCTATCGAACACATTGTTGTGTCGCACACGCA<br>CCGAGGCAAGGAGTCGCGCACAGTCTCATCGAATTTGCGAAAAAGTGGGCACTAAGCAGACA<br>GCTCCTTGGCATAACGATTAGAGACACAAACGAACAATGTACCTGCCTGCAATTTGTACGAAAAAT<br>GTGGCTTTACTCTCGGCGGCATTGACCTCTTACGTATAAACTAGACCTCAAGTCTCGAACGAA<br>ACAGCGATGTACTGGTACTGTTCTCGGGAGCACAGGATGACGCCTAA |
| <i>C. albicans</i> URA3<br>terminator region        | CATATGTGAAGTGTGAAGGGGGAGATTTTCACTTTATTAGATTTGTATATATGTATAATAAATAAA<br>TAAATAAGTTAAATAAATAATTAGATAAGGGTGGTAATTATTACTATTTACAATCAAAGGTGGTC<br>CTGCAT                                                                                                                                                                                                                                                                                                                                                                                                                                                                                                                                                                                                                                                                                                                                                                                                                                                                                                                                                                                                                                                                                                                                                                                               |
